1                   **CONFLICTING AUXIN-PHOSPHATE SIGNALS IMPACT ON RSL2 EXPRESSION AND ROS-**  
2                   **HOMEOSTASIS LINKED TO ROOT HAIR GROWTH IN *ARABIDOPSIS***

3  
4 How plant cells regulate their size is one of the most fascinating questions in current plant biology.  
5 Root hairs are single plant cells that can expand several hundred-fold their original size and they are  
6 an excellent model system for learning about cell size regulation. Root hair size determines the  
7 surface area/volume ratio of the whole roots exposed to nutrient and water pools, thereby likely  
8 impacting nutrient and water uptake rates. The speed at which they grow is determined by cell-  
9 intrinsic factors like hormones (e.g., auxin and ethylene) and external environmental signals like  
10 nutrients availability in the soil (e.g., phosphate and nitrates) (Feng et al. 2017; Marzol et al. 2017).  
11 The root hair polar growth program is initially triggered by the transcription factors (TFs) of basic  
12 helix-loop-helix (bHLH) family RHD6 (ROOT HAIR DEFECTIVE 6) /RSL1 (ROOT HAIR DEFECTIVE 6 LIKE  
13 1) in the initiation phase, and then, activated by the expression of RSL4/RSL2 during the elongation  
14 phase (Menand et al. 2007; Yi et al. 2010). Hormones and environmental cues converge to regulate  
15 the expression of RSL4, which controls the final root hair cell size (Yi et al. 2011; Lee et al.2013;  
16 Datta et al. 2015; Song et al. 2016; Rymen et al. 2017). Although, in this process, other TFs might act  
17 in a coordinative manner under specific signals such as Pi-starvation and ethylene as this is the case  
18 for EIN3 (ETHYLENE INSENSITIVE 3)/EIL1 (ETHYLENE INSENSITIVE 3-LIKE 1) and LRL3 (LOTUS  
19 JAPONICA Roothairless-Like1) (Yi et al. 2010; Song et al. 2016, Feng et al. 2017). Recently, it was  
20 found that auxin, by releasing several ARFs (e.g., ARF5, ARF7, ARF8 and ARF19) from Aux/IAA  
21 proteins, directly activates RSL4 expression and controls root hair growth linked to ROS-  
22 homeostasis involving three RESPIRATORY BURST OXIDASE HOMOLOG proteins (e.g., RBOHC,H,J)  
23 and four type-III secreted peroxidases (e.g., PER1,44,73) (Mangano et al. 2017). In addition, RSL2  
24 was also involved in the auxin-mediated growth response although it was unclear its mode of action  
25 at the molecular level (Mangano et al. 2017). Conversely, high levels of inorganic phosphates (Pi) in  
26 the soil (or in the media) are able to strongly repress RSL4 expression linked to polar growth by an  
27 unknown mechanism while Pi-starvation results in an extensive outgrowth of root hairs. This  
28 response is associated with increased activity of two MYB-transcription factors, PHR1 (PHOSPHATE  
29 STARVATION RESPONSE) and PHR1-LIKE1 (PHL1), the homeodomain transcription factor AL6/PER2

30 (ALFIN-LIKE6/Pi DEFICIENCY ROOT HAIR DEFECTIVE 2), EIN3/ENL1, and RSL4 (Bustos et al., 2010; Yi  
31 et al., 2010; Chandrika et al., 2013; Datta et al. 2015; Song et al. 2016; Feng et al. 2017). Here, we  
32 examined by which mechanism root hairs integrate conflicting growth-signals like the repressive  
33 high Pi-level clue and a concomitant high auxin exposure that should promote growth and  
34 questioned if these complex signals might activate known molecular players in polar growth.

35

### 36 **Auxin overcome Pi-repression of root hair growth in a ROS-dependent manner**

37 Increased levels of Pi in the media (from 1-20 mM) were able to strongly repress root hair growth as  
38 previously reported (Datta et al. 2015; Song et al. 2016) as well as to greatly reduce the Reactive  
39 Oxygen Species (ROS) levels in root hair cells in the *Arabidopsis thaliana* model. ROS levels were  
40 measured at the root hair cell tip with the cell permeable probe H<sub>2</sub>DCF-DA (2',7'-  
41 dichlorodihydrofluorescein diacetate) that becomes irreversibly fluorescent under ROS-oxidation.  
42 Then, an exogenous auxin supply (100 nM IAA, Indole 3-Acetic Acid) was able to restore root hair  
43 growth independently of the level of Pi in the media (**Figure 1A**). In addition, ROS levels were also  
44 re-established in the auxin-treated root hairs even in the presence of high-levels of Pi suggesting  
45 that both signals, high-Pi levels as well as high-auxin, operated in an opposed manner by a ROS-  
46 dependent mechanism (**Figure 1A**). Then, it was tested whether the suppression of ROS-derived  
47 from RBOHs activities with VAS2870 (VAS, a specific RBOHs inhibitor) might affect auxin growth-  
48 effect in the presence of Pi (**Figure 1B**). VAS treatment was able to revert the auxin growth-effect at  
49 the root hair level by down-regulating RBOHs-derived ROS production (**Figure 1B**). A similar  
50 repressive effect was obtained when *rbohC* mutant with low-ROS, was incubated with auxin in the  
51 presence of high Pi-levels (**Figure 1B**). This confirms that drastic changes in ROS-homeostasis  
52 controlled mostly by RBOHC inhibit auxin growth promoting effect. It was previously shown that the  
53 over-expression of either RSL4 or Auxin Response Factor 5 (ARF5) under the control of the root hair  
54 EXPANSIN 7 promoter (E7) led to high-levels of ROS (Mangano et al. 2017). In addition, E7:RSL4 and  
55 E7:ARF5 were more insensitive to high Pi levels than Wt Col-0 and they developed almost regular  
56 extended root hairs (**Figure 1C**). This result indicates that high expression of RSL4 or constitutive  
57 activated auxin signaling, both are able to partially repress the high levels of Pi-growth effect. To  
58 corroborate the ROS measurements performed with the H<sub>2</sub>DCF-DA probe as well as to determine if

59 the main ROS molecule involved was hydrogen peroxide ( $H_2O_2$ ), we measured cytoplasmic  $H_2O_2$   
60 ( $_{cyt}H_2O_2$ ) levels using a genetically encoded YFP-based  $H_2O_2$  sensor, HyPer (Mangano et al. 2017).  
61 Similar results were obtained for high-levels of Pi that first repressed cytoplasmic  $H_2O_2$  while  
62 exogenous auxin was able to trigger an up-regulation of the ROS-signal in the presence of high-Pi in  
63 the root hairs (**Figure 1D**). All together indicates that auxin is able to overcome Pi-growth repression  
64 and it requires ROS-production to trigger proper polar-growth.

65

### 66 **Expression of RSL2 is required to bypass Pi-growth repression in the presence of auxin**

67 In order to have insights on the molecular mechanism behind these high Pi-auxin conflicting  
68 responses, we tested root hair growth linked to ROS-levels in the absence of RSL2 and RSL4 TFs that  
69 were shown to regulate the auxin-mediated root hair growth-response (Datta et al. 2015; Mangano  
70 et al. 2017). The double mutant *rs/2 rs/4* is not capable of develop visible root hairs in any condition  
71 tested, either under high levels of auxin or ethylene or nutrient deprivation suggesting that both  
72 TFs are necessary to run the basic transcriptional machinery to produce root hairs (Mangano et. al  
73 2017; Feng et al. 2017). High Pi-level strongly represses the expression of both, RSL2 and RSL4 TFs in  
74 the Wt Col-0 roots while auxin treatment up-regulates both TFs, and not only RSL4 as previously  
75 indicated (Pires et al. 2013). When *rs/4* (that lacks RSL4 transcripts) was tested, the response was  
76 similar to Wt Col-0 root hairs but strongly attenuated indicating that auxin can rescue the negative  
77 effect of high-Pi levels, possibly mediated by RSL2 action. In agreement with this idea, when RSL2  
78 was lacking (in *rs/2* mutant), there was almost no response associated to the auxin treatment  
79 (**Figure 1E**). This indicates that RSL2 mediates the auxin rescue-response in the presence of high Pi-  
80 levels. In addition, ROS measurements in Wt Col-0 as well as in *rs/4* and *rs/2* mutants positively  
81 correlate with growth responses in all conditions tested (**Figure 1F**). As a complementary approach,  
82 levels of RSL2 and RSL4 transcripts were measured in their respective mutant backgrounds (*rs/4* and  
83 *rs/2*, respectively) to define if any of these two TFs depends on the presence of the other to be  
84 expressed under these conflicting growth conditions (**Figure 1F**). In the *rs/4* mutant background, the  
85 expression of RSL2 was down regulated 50% to the levels found in Wt Col-0, while, in *rs/2*  
86 background, the level of RSL4 expression was three to four-times lower in all conditions measured  
87 (e.g., no Pi or auxin added, high Pi-level, high auxin, or both). This indicates that the absence of

88 RSL2 might affect RSL4 expression, and when RSL4 is lacking, RSL2 transcripts also decrease  
89 suggesting a positive feed forward loop between RSL4-RSL2 by a direct or indirect mechanism that  
90 requires further investigation.

91

92 Several possible scenarios can now be considered to understand how auxin together with high Pi-  
93 levels control root hair growth (**Figure S2**). Since high levels of Pi strongly repress root hair growth  
94 and ROS-production, Pi might operate at several regulatory points such as down regulating auxin  
95 biosynthesis, auxin-conjugation and transport within the roots towards the trichoblast cells  
96 (Velasquez et al. 2016), and then, indirectly affecting RSL4/RSL2 expression. Alternatively, high Pi  
97 levels could directly repress RSL4/RSL2 expression by an unknown mechanism. Recently, abscisic  
98 acid (ABA) throughout the TF OBP4 (OBF BINDING PROTEIN 4) was able to repress RSL2 (and RSL3)  
99 expression indicating that multiple hormonal signals on top of auxin may operate in these cells as  
100 previously described (Rymen et al. 2017). In addition, it is plausible that RSL2 and RSL4 would be  
101 able to form protein dimers as reported in other several TFs that contains HLH domain (Feller et al.  
102 2011), more precisely heterodimers (e.g., RSL2-RSL4) and homodimers (e.g., RSL2-RSL2 and RSL4-  
103 RSL4) with slightly different transcriptional downstream target genes. Since it has been shown that  
104 RSL4 is able to self-activate by a forward positive-loop (Hwang et al. 2017), we hypothesized that  
105 RSL2 would be also capable to the same. In addition, RSL2 would be able to up-regulate RSL4, and  
106 vice versa as it was suggested in a previous work (Pires et al. 2013). Further studies are now  
107 required to establish the interconnections between both TFs under the different conditions of auxin  
108 and Pi tested in this work. Second, since RSL4 is directly activated by ARF5 (and possible several  
109 other ARFs including ARF7,8,19) in trichoblast cells (Mangano et. al 2017), we also postulate that  
110 RSL2 would be up-regulated by some of these ARFs since auxin triggers its expression two and half-  
111 times (**Figure 1E**). In agreement, three consensus Aux-RE sites are found in the regulatory region of  
112 RSL2 as possible targets for ARFs binding (not shown). Still how the fine-tune regulation of ARFs on  
113 the RSL2-RSL4 is coordinated remains to be discovered. In summary, although it has been shown  
114 before that auxin triggers root hair cell elongation while high Pi-levels repress its growth, it was  
115 unknown how both conflicting signals might act together. This study identifies a new layer of

116 complexity between RSL2/RSL4 TFs acting on ROS-homeostasis under conflicting growth-signals at  
117 the root hair level.

118 **Figure Legend**

119 **Figure 1. Auxin overcomes high-Pi root hair growth-repression by enhancing RSL2 expression**  
120 **linked to ROS-homeostasis.**

121 A. Auxin circumvents root hair growth repression imposed by increased levels of Pi by enhancing  
122 ROS-production. Root hair length (mean  $\pm$  SD) was measured in Wt Col-0 roots non-treated, treated  
123 with 100nM IAA (indole 3-acetic acid) or with 5mM inorganic Pi, or both treatments at the same  
124 time (on the left). Total ROS levels generated by oxidation of H<sub>2</sub>DCF-DA were measured at the root  
125 hair tip in different stages of root hair development in the four different treatments (on the right).

126 B. Auxin recovery of root hair growth is dependent on ROS-production. Root hairs treated with 100  
127 nM IAA in the presence of high levels of Pi and VAS inhibitor fails to recover its normal growth (on  
128 the left). ROS-levels were down regulated in the treated root hairs with 100 nM IAA in the presence  
129 of high levels of Pi and VAS inhibitor (on the right). ND= root hairs not detected.

130 C. High levels of ARF5 and RSL4 expression in root hairs cells (EXPANSIN 7 promoter, E7) are able to  
131 partially overcome the growth repression imposed by high levels of Pi on cell elongation.  
132 Comparisons are made between Wt Col-0 and E7:ARF5 or E7:RSL4 lines under high levels of Pi.

133 D. Auxin trigger changes in  $_{\text{cyt}}\text{H}_2\text{O}_2$  levels detected with HyPer.  $_{\text{cyt}}\text{H}_2\text{O}_2$  levels Wt Col-0 root hairs  
134 expressing HyPer sensor treated with 5 mM Pi and 100 nM IAA.  $_{\text{cyt}}\text{H}_2\text{O}_2$  levels are based on the ratio  
135 488/405 nm of HyPer biosensor at the root hair tip over 200 s. On the right, selected kymographs  
136 resulting of this analysis only for root hairs of >200  $\mu\text{m}$  in length. Scale bar = 5  $\mu\text{m}$ .

137 E. RSL2 but not RSL4 mediates the auxin recovery response in the presence of high Pi-levels. Root  
138 hair length (mean  $\pm$  SD) was measured in Wt Col-0, *rs/4* and *rs/2* roots non-treated, treated with  
139 100nM IAA (indole 3-acetic acid) or with 5mM inorganic Pi, or both treatments at the same time.  
140 ROS-levels were partially recovered in Wt but not in *rs/2* when treated with 100 nM IAA in the  
141 presence of high levels of Pi. No ROS was detected in *rs/4* under high levels of Pi. Only root hairs  
142 <200  $\mu\text{m}$  in length were analyzed.

143 F. Auxin under high Pi-levels triggers the expression of both, RSL4 and RSL2. Levels of RSL4 and RSL2  
144 expression in Wt Col-0 roots non-treated treated with 100nM IAA (indole 3-acetic acid) or with  
145 5mM inorganic Pi, or both treatments at the same time (on the left). Levels of RSL4 and RSL2  
146 expression in *rs/2* and *rs/4* respectively non-treated treated with 100nM IAA (indole 3-acetic acid) or

147 with 5mM inorganic Pi, or both treatments at the same time (on the left). Each qRT-PCR reaction  
148 was performed in triplicate, and each experiment was repeated three times using independent  
149 preparations of RNA. Comparisons are made in the same genetic background between levels of  
150 gene expression (of RSL2 or RSL4) in non-treated samples (no IAA/no Pi) versus treated with IAA or  
151 Pi. In addition, Pi-treated samples are compared only to Pi+IAA-treated roots. In Figs 1A-F, *P*-value  
152 of one-way ANOVA, (\*\*)  $P < 0.001$ , (\*)  $P < 0.01$ . NS= not significant differences. Error bars indicate  
153  $\pm$ SD from 3 biological replicates.

154 **Word count: 544**

155

### 156 **Acknowledgements**

157 We apologize for the inadvertent omission of any pertinent original references owing to space  
158 limitations. No conflict of interest is declared.

159

### 160 **Author's contributions:**

161 S.M performed all the experiments, reviewed the text, figures, and references; S.P.D.J. performed  
162 some of the HyPer experiments; E.M. and C.B. reviewed text, references, and figures; J.M.E  
163 conceived the project, designed the figures, and wrote the article with contributions of all the  
164 authors.

165

### 166 **Competing financial interest**

167 The authors declare no competing financial interests. Correspondence and requests for materials  
168 should be addressed to J.M.E. (Email: [jestevez@leloir.org.ar](mailto:jestevez@leloir.org.ar)).

169

### 170 **Financial source**

171 This work was supported by a grant from ANPCyT (PICT2014-0504 and PICT2016-0132) and ICGEB  
172 (CRP/ARG16-03 Grant) to J.M.E and a grant from ANPCyT (PICT2016-0491) to S.M.

173 **Silvina Mangano<sup>1</sup>, Silvina Paola Denita-Juarez<sup>1</sup>, Eliana Marzol<sup>1</sup>, Cecilia Borassi<sup>1</sup>, and José M.**  
174 **Estevez<sup>1,†</sup>**

175  
176 <sup>1</sup>Fundación Instituto Leloir and Instituto de Investigaciones Bioquímicas de Buenos Aires (IIBBA-  
177 CONICET), Av. Patricias Argentinas 435, Buenos Aires CP C1405BWE, Argentina. TEL: (+54)-115238-  
178 7500 EXT. 3206. Email: [jestev@leloir.org.ar](mailto:jestev@leloir.org.ar). [Twitter @EstevezJoseM](https://twitter.com/EstevezJoseM)

179 <sup>†</sup> Author for correspondence: José M. Estevez

180

181 **Word count: 1,659**

182 **1 Figure**

183 **17 references**



184 REFERENCES

- 185 **Bustos R, Castrillo G, Linhares F, Puga MI, Rubio V, Pérez-Pérez J, Solano R, Leyva A, Paz-Ares J**  
186 (2010) A central regulatory system largely controls transcriptional activation and repression  
187 responses to phosphate starvation in Arabidopsis. *PLoS Genet* **6**: e1001102
- 188 **Chandrika NNP, Sundaravelpandian K, Yu SM, Schmidt W** (2013) ALFIN-LIKE 6 is involved in root  
189 hair elongation during phosphate deficiency in Arabidopsis. *New Phytol* **198**:709–720
- 190 **Datta S, et al.** (2015) Intensity of a pulse of RSL4 transcription factor synthesis determines  
191 Arabidopsis root hair cell size. *Nat. Plants* **1**:15138
- 192 **Feller A, Machemer K, Braun EL, Grotewold E** (2011) Evolutionary and comparative analysis of MYB  
193 and bHLH plant transcription factors. *Plant J.* **66**:94-116.
- 194 **Feng Y, Xu P, Li B, Wen X, An F, Gong Y, Xin Y, Zhu Z, Wang Y, Guo H.** (2017). Ethylene promotes  
195 root hair growth through coordinated EIN3/EIL1 and RHD6/RSL1 activity in Arabidopsis. *Proc*  
196 *Natl Acad Sci USA.* doi/10.1073/pnas.1711723115
- 197 **Hwang, Y. et al.** (2017) Tracheophytes Contain Conserved Orthologs of a Basic Helix-loop-helix  
198 Transcription Factor to Modulate ROOT HAIR SPECIFIC Genes. *Plant Cell*  
199 doi:10.1105/tpc.16.00732
- 200 **Lee RD-W and Cho H-T.** (2013) Auxin, the organizer of the hormonal/environmental signals for root  
201 hair growth. *Frontiers in Plant Sci* **4**, 448. doi: 10.3389/fpls.2013.00448
- 202 **Lee Y., M.C. Rubio, J. Alassimone, N. Geldner.** (2013). A mechanism for localized lignin deposition  
203 in the endodermis. *Cell* **153**, 402-412.
- 204 **Lin Q et al.** (2015) GLABRA2 directly suppresses basic Helix-Loop-Helix transcription factor genes  
205 with diverse functions in root hair development. *Plant Cell* **27**:2894-906
- 206 **Mangano S, et al.** (2017). The molecular link between auxin and ROS-controlled root hair growth.  
207 *Proc Natl Acad Sci USA.* doi/10.1073/pnas.1701536114
- 208 **Menand B, Yi K, Jouannic S, Hoffmann L, Ryan E, Linstead P, Schaefer DG, Dolan L** (2007) An  
209 ancient mechanism controls the development of cells with a rooting function in land plants.  
210 *Science* **316**:1477-1480
- 211 **Pires ND, et al.** (2013) Recruitment and remodeling of an ancient gene regulatory network during  
212 land plant evolution. *Proc. Natl. Acad. Sci. USA.* **110**:9571-9576
- 213 **Rymen B, et al.** (2017) ABA Suppresses Root Hair Growth via the OBP4 Transcriptional Regulator.  
214 *Plant Physiol.* **173**(3):1710–1762
- 215 **Song L, Yu H, Dong J, Che X, Jiao Y, Liu D** (2016) The molecular mechanism of ethylene-mediated  
216 root hair development induced by phosphate starvation. *PLoS Genet.* 2016, 12: e1006194.
- 217 **Velasquez, S.M. et al.** (2016) Auxin and cellular elongation. *Plant Physiol.* **170**:1206-1215.
- 218 **Yi, K. et al.** (2010) A basic helix-loop-helix transcription factor controls cell growth and size in root  
219 hairs. *Nat. Gen.* **42**:264-267
- 220 **Zhang S. et al.** (2016). Multiple phytohormones promote root hair elongation by regulating a similar  
221 set of genes in the root epidermis in Arabidopsis. *J. Exp. Bot.* **67**(22): 6363–6372

## 222 **Supplementary Information**

223 Material and Methods. Supplementary Figures S1-S2. Supplementary Tables S1-S2.

224

225

## 226 **Materials and Methods.**

227 **Plant Growth and mutant isolation.** *Arabidopsis thaliana* Columbia-0 (Col-0) was used as the wild  
228 type (Wt) genotype in all experiments, unless stated otherwise. All mutants and transgenic lines  
229 tested are in this ecotype. Seedlings were germinated on agar plates in a Percival incubator at 22°C  
230 in a growth room with 16h light/8h dark cycles for 10 days at 140  $\mu\text{mol m}^{-2}\text{s}^{-1}$  light intensity. Plants  
231 were transferred to soil for growth under the same conditions as previously described at 22°C. For  
232 identification of T-DNA knockout lines, genomic DNA was extracted from rosette leaves.  
233 Confirmation by PCR of a single and multiple T-DNA insertions in the target RBOH and PER genes  
234 were performed using an insertion-specific LBb1 or LBb1.3 (for SALK lines) or Lb3 (for SAIL lines)  
235 primer in addition to one gene-specific primer. To ensure gene disruptions, PCR was also run using  
236 two gene-specific primers, expecting bands corresponding to fragments larger than in Wt. In this  
237 way, we isolated homozygous lines (for all the genes mentioned above). Mutant list is detailed in

### 238 **Supplementary Table S1.**

239

240 **Growth media. RBOHs inhibition and auxin treatment.** Sterilized seeds were stored at 4°C in sterile  
241 water were for 48 hours and then were germinated on agar plates containing modified Hoagland  
242 solution contained 1 mM  $\text{Ca}(\text{NO}_3)_2$ , 50  $\mu\text{M}$   $\text{CaCl}_2$ , 0.25 mM  $\text{MgSO}_4$ , 50  $\mu\text{M}$  Fe-NaEDTA, 1 mM KCl, 2  
243  $\mu\text{M}$   $\text{MnSO}_4 \cdot 2\text{H}_2\text{O}$ , 0.5  $\mu\text{M}$   $\text{CuSO}_4 \cdot 5\text{H}_2\text{O}$ , 0.5  $\mu\text{M}$   $\text{Na}_2\text{MoO}_4 \cdot 2\text{H}_2\text{O}$ , 2  $\mu\text{M}$   $\text{Zn SO}_4 \cdot 7\text{H}_2\text{O}$  and 2.5mM MES  
244 containing low phosphate (5  $\mu\text{M}$   $(\text{NH}_4)_2\text{HPO}_4$ ). Media were adjusted to a pH of 5.7 and solidified  
245 using 0.8% agar. After 5 days plants were transferred into to modified Hoagland solution with low  
246 phosphate (5  $\mu\text{M}$   $(\text{NH}_4)_2\text{HPO}_4$ ) or high phosphate (5 mM  $(\text{NH}_4)_2\text{HPO}_4$ ). Low and high phosphate  
247 were combined with 100 nM of indole-3-acetic acid (IAA) or/and 15  $\mu\text{M}$  of VAS2870 (VAS, for 3-  
248 Benzyl-7-(2-benzoxazolyl)thio-1,2,3-triazolo(4,5-d)pyrimidine). After 5 days (10 days old),  
249 quantitative analysis of root hair phenotypes and total ROS measurements with  $\text{H}_2\text{DCF-DA}$  were  
250 made.

251

252 **Root hair phenotype.** For quantitative analysis of root hair phenotypes in *rboh* mutants and Wt Col-  
253 0, 200 fully elongated root hairs were measured (n roots= 30) from seedlings grown on vertical  
254 plates for 10 days. Values are reported as the mean  $\pm$ SD using the Image J 1.50b software.  
255 Measurements were made on images were captured with an Olympus SZX7 Zoom microscope  
256 equipped with a Q-Colors digital camera.

257

258  **$\text{H}_2\text{DCF-DA}$  probe used to measure total ROS.** *Arabidopsis* seeds were grown in plates with sterile  
259 agar 1% for 8 days in chamber at 22°C with continuous light. These seedlings were incubated with

260 2',7'-Dichlorodihydrofluorescein diacetate (H<sub>2</sub>DCF-DA) in darkness in a slide for 10 min 50 μM at  
261 room temperature. Samples were observed with a confocal microscope equipped with 488 nm  
262 argon laser and BA510IF filter sets. It was used the following configuration (10X objective, 0.30 NA;  
263 4.7 laser intensity, 1.1 off set, 440 PMT for highest ROS levels and 480 PMT for ROS media and 3 of  
264 gain. Images were taken scanning XZY with a 2 μm between focal planes. Images were analyzed  
265 using ImageJ. To measure ROS highest levels, a circular ROI (r=2.5) was taken in the zone of the root  
266 hair with highest intensities. To measure ROS mean the total area of the root hair was taken.  
267 Pharmacological treatments were carried out with a combination of the following reagents: 1-20  
268 mM Pi, 100 nM IAA, and 15 μM of VAS2870. The sample was washed with a MS 0.5X solution and  
269 the image acquisition was made with 10X objective and 400ms of exposure-time in an  
270 epifluorescence microscope (Zeiss, Imager A2). To measure ROS levels a circular ROI (r=2.5) was  
271 taken in the tip of the root hair. Values are reported as the mean ±SD using the Image J 1.50b  
272 software.

273  
274 **HyPer sensor to measure <sub>cyt</sub>H<sub>2</sub>O<sub>2</sub>.** HyPer consists of a circularly permuted YFP (cpYFP) molecule  
275 coupled to a regulatory domain of the *Escherichia coli* H<sub>2</sub>O<sub>2</sub> sensor OxyR (1-4). When exposed to  
276 H<sub>2</sub>O<sub>2</sub>, the excitation peak of cpYFP shifts from 420 to 500 nm, while the emission peak remains at  
277 516 nm allowing it to be used as a ratiometric biosensor (Mangano et al. 2017). Ten day-old  
278 *Arabidopsis* seedlings expressing the fluorescent HyPer biosensor were used. Root hairs were ratio  
279 imaged with the Zeiss LSM 510 laser scanning confocal microscope (Carl Zeiss) using a 40X oil-  
280 immersion, 1.2 numerical aperture. The HyPer biosensor was excited with both the 405 nm blue  
281 diode laser and with the 488 nm argon laser. The emission (516 nm) was collected using a primary  
282 dichroic mirror and the Meta-detector of the microscope. For time-lapse analysis, images were  
283 collected every 3s. To measure ROS highest levels, a circular ROI (r=2.5) was taken in the root hair  
284 tip for each image the time lapse. Treatments were made *in vivo* with 5mM Pi, 100 nM IAA, or 50  
285 μM of VAS2870. Values are reported as the mean ±SD using the Image J 1.50b software.

286  
287 **Quantitative reverse transcriptase PCR (qRT-PCR).** Total RNA was isolated from 10-d-old seedling  
288 roots (40 for each line) using the RNAzol RT (MRC). cDNA was synthesized using M-MLV Reverse  
289 Transcriptase (Promega). qRT-PCR analyses were performed using LightCycler480 SYBR Green I  
290 Master-Roche. Gene-specific signals were normalized relatively to PP2A (AT1G69960;  
291 serine/threonine protein phosphatase 2A) signals. Each qRT-PCR reaction was performed in  
292 triplicate, and each experiment was repeated three times using independent preparations of RNA.  
293 Primers used are as listed in **Supplementary Table S2**.

294 **Legend to Figure S1.**

295  
296 **Figure S1. Auxin fails to overcome high-Pi root hair growth-repression in a low ROS-depleted**  
297 **background (in *nox* and *per44,73* mutants).**

298 Auxin fails to circumvent root hair growth repression imposed by increased levels of Pi in a ROS-  
299 depleted *rboh* mutant. Root hair length (mean  $\pm$  SD) was measured in *rboh* roots treated with  
300 with 5mM inorganic Pi with or without 100nM IAA (indole 3-acetic acid) (on the left). Total ROS  
301 levels generated by oxidation of H<sub>2</sub>DCF-DA were measured at the root hair tip in different stages of  
302 root hair development in the four different treatments (on the right).

303 **Word count: 97**

304  
305 **Figure S2. Proposed models of auxin-RSL2/RSL4 regulation of ROS mediated polar root hair**  
306 **growth in the absence and in presence of high-Pi.** Transcriptional responses under high-level of  
307 auxin in the absence of Pi (A), in the presence of high Pi with very low-level of auxin (B), and in high  
308 levels of Pi together with high levels of auxin (C) are shown.

309 A. The bHLH transcription factor RSL4 as well as RSL2 are both transcriptionally activated by high  
310 levels of auxin (IAA) and its expression is directly regulated by several Auxin Response Factors  
311 (ARFs; ARF5,7,8,19). Throughout RSL4 (and possibly RSL2), auxin activates the expression of two  
312 RBOHs (RBOHC,J) and four PERs (PER1,44,60,73) that together regulate ROS homeostasis in the  
313 apoplast (in combination with RBOHH). Based on Mangano et al. (2017) and the present work.

314 B. High level of Pi in a low auxin level environment would be sufficient to repress the RSL4/RSL2  
315 transcriptional response. Pi repression act depleting auxin levels in the atricoblast (1) or repressing  
316 by an unknown mechanism directly the expression of RSL4/RSL2 (2).

317 C. High levels of Pi in the presence of high levels of auxin are able to activate the expression of RSL2  
318 and control ROS-homeostasis derived from RBOHs and PERs activities. Solid lines indicate  
319 transcriptional activation or metabolite production. Reactive Oxygen Species (ROS) include hydroxyl  
320 radical ( $\bullet$ OH), superoxide ion ( $O_2^{\bullet-}$ ) and hydrogen peroxide (H<sub>2</sub>O<sub>2</sub>).

321 **Word count: 234**

322

323 **Supplementary Table S1.** RSLs and NADPH oxidase C (RBOHC) mutant line used in this study. All are  
 324 in Col-0 background.  
 325

| Name         | Locus     | Mutant name   | Mutant code      | References            |
|--------------|-----------|---------------|------------------|-----------------------|
| <b>RSLs</b>  |           |               |                  |                       |
| <b>RSL2</b>  | At3g33880 | <i>rsl2-1</i> | SAIL line 514C04 | Yi, K. et al. (2010)  |
| <b>RSL4</b>  | At1g27740 | <i>rsl4-1</i> | GT_5_105706      | Yi, K. et al. (2010)  |
| <b>RBOH</b>  |           |               |                  |                       |
| <b>RBOHC</b> | At5g51060 | <i>rboh-1</i> | Salk_071801      | Lee, Y. et al. (2013) |

326  
 327  
 328 **Supplementary Table S2.** Primer List used for qPCR.  
 329

| Gene                     | Position from start codon | Sequence             | Direction |
|--------------------------|---------------------------|----------------------|-----------|
| <b>RSL2</b><br>At3g33880 | 896                       | CCCAATGGAACAAAGGTC   | Forward   |
|                          | 1036                      | TCTCGGTGAGCTGAGACCAA | Reverse   |
| <b>RSL4</b><br>At1g27740 | 597                       | GTGCCAACGGGACAAAAGT  | Forward   |
|                          | 735                       | TTGTGATGGAACCCCATGTC | Reverse   |
| <b>PP2A</b><br>At1g69960 | 1785                      | TAACGTGGCCAAAATGATGC | Forward   |
|                          | 1845                      | GTTCTCCACAACCGCTTGGT | Reverse   |

330

## Figure 1

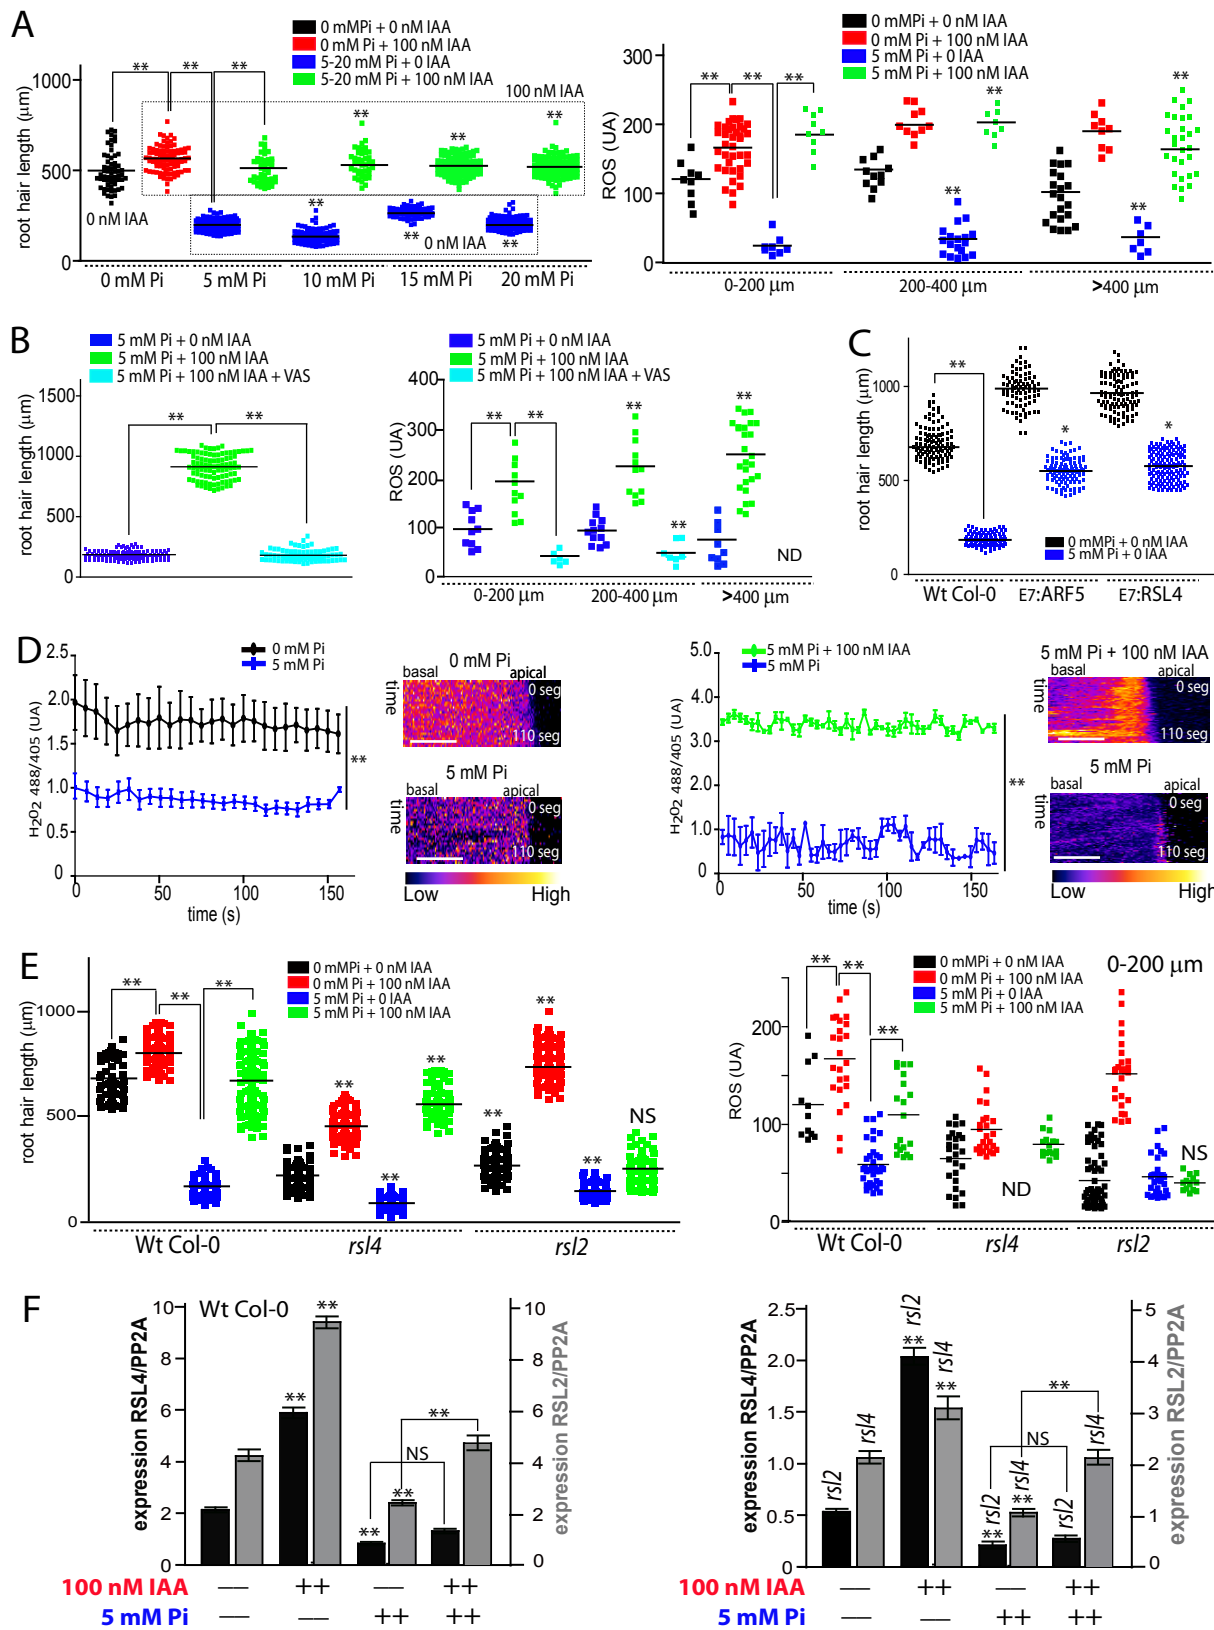

**Figure 1. Auxin overcomes high-Pi root hair growth-repression by enhancing RSL2 expression linked to ROS-homeostasis.** A. Auxin circumvents root hair growth-repression imposed by increased levels of Pi by enhancing ROS-production. Root hair length (mean  $\pm$  SD) was measured in Wt Col-0 roots non-treated, treated with 100nM IAA (indole 3-acetic acid) or with 5mM inorganic Pi, or both treatment at the same time (on the left). Total ROS levels generated by oxidation of H<sub>2</sub>DCF-DA were measured at the root hair tip in different stages of root hair development in the four different treatments (on the right). B. Auxin recovery of root hair growth is dependent on ROS-production. Root hairs treated with 100 nM IAA in the presence of high levels of Pi and VAS inhibitor fails to recover its normal growth (on the left). ROS-levels were down regulated in the treated root hairs with 100 nM IAA in the presence of high levels of Pi and VAS inhibitor (on the right). ND= root hairs not detected. C. High levels of ARF5 and RSL4 expression in root hairs cells (EXPANSIN 7 promoter, E7) are able to partially overcome the growth repression imposed by high levels of Pi on cell elongation. Comparisons are made between Wt Col-0 and *E7:ARF5* or *E7:RSL4* lines under high levels of Pi. D. Auxin trigger changes in <sup>16</sup>O<sub>2</sub>H<sub>2</sub>O<sub>2</sub> levels detected with HyPer<sub>16</sub>O<sub>2</sub>H<sub>2</sub>O<sub>2</sub> levels Wt Col-0 root hairs expressing HyPer sensor treated with 5 mM Pi and 100 nM IAA. <sup>16</sup>O<sub>2</sub>H<sub>2</sub>O<sub>2</sub> levels are based on the ratio 488/405 nm of HyPer biosensor at the root hair tip over 200 s. On the right, selected kymographs resulting of this analysis only for root hairs of >200  $\mu$ m in length. Scale bar = 5  $\mu$ m. E. RSL2 but not RSL4 mediates the auxin recovery response in the presence of high Pi-levels. Root hair length (mean  $\pm$  SD) was measured in Wt Col-0, *rsI4* and *rsI2* roots non-treated, treated with 100nM IAA (indole 3-acetic acid) or with 5mM inorganic Pi, or both treatment at the same time. ROS-levels were partially recovered in Wt but not in *rsI2* when treated with 100 nM IAA in the presence of high levels of Pi. No ROS was detected in *rsI4* under high levels of Pi. Only root hairs <200  $\mu$ m in length were analyzed. F. Auxin under high Pi-levels triggers the expression of both, RSL4 and RSL2. Levels of RSL4 and RSL2 expression in Wt Col-0 roots non-treated treated with 100nM IAA (indole 3-acetic acid) or with 5mM inorganic Pi, or both treatments at the same time (on the left). Levels of RSL4 and RSL2 expression in *rsI2* and *rsI4* respectively non-treated treated with 100nM IAA (indole 3-acetic acid) or with 5mM inorganic Pi, or both treatments at the same time (on the right). Each qRT-PCR reaction was performed in triplicate, and each experiment was repeated three times using independent preparations of RNA. Comparisons are made in the same genetic background between levels of gene expression (of RSL2 or RSL4) in non-treated samples (no IAA/no Pi) versus treated with IAA or Pi. In addition, Pi-treated samples are compared only to Pi+IAA-treated roots. In Figs. 1A-E, P-value of one-way ANOVA, (\*\*) P<0.001, (\*) P<0.01. NS= not significant different. In A-E Error bars indicate  $\pm$ SD from 3 biological replicates.

Figure S1

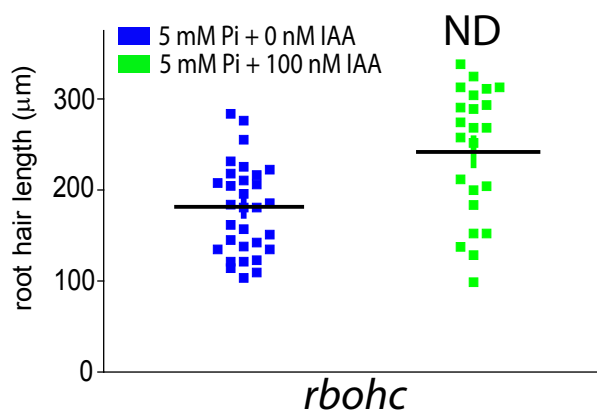

## Figure S2

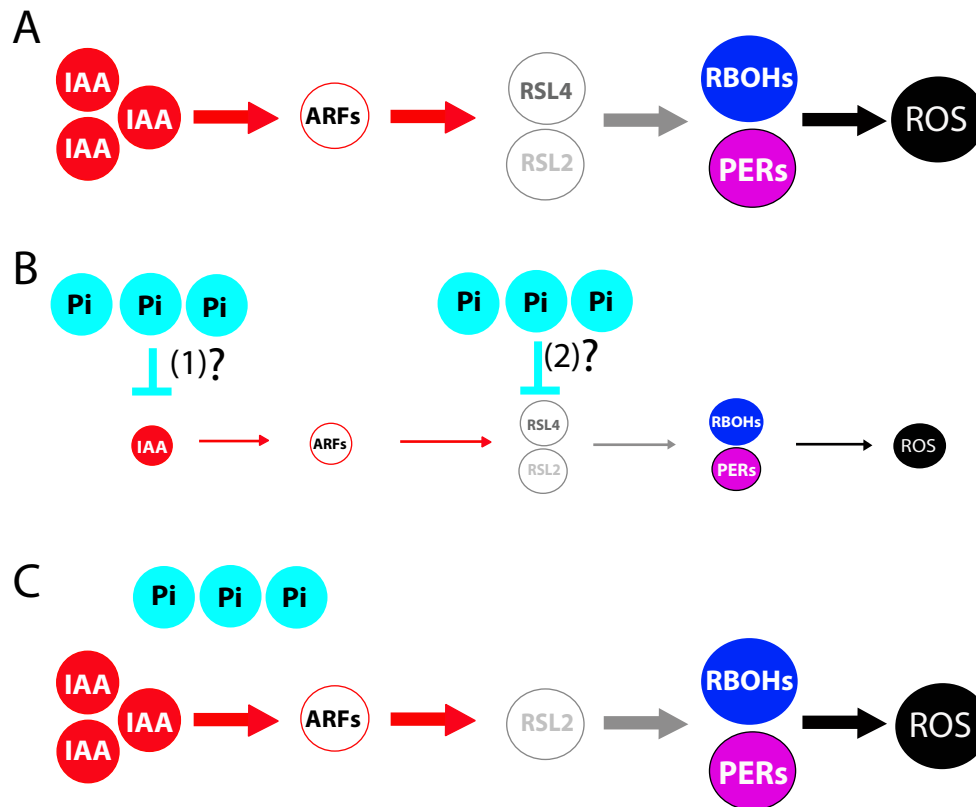

**Figure S2. Proposed models of auxin-RSL2/RSL4 regulation of ROS mediated polar root hair growth in the absence and in presence of high-Pi.** Transcriptional responses under high-level of auxin in the absence of Pi (A), in the presence of high Pi with very low-level of auxin (B), and in high levels of Pi together with high levels of auxin (C) are shown. A. The bHLH transcription factor RSL4 as well as RSL2 are both transcriptionally activated by high levels of auxin (IAA) and its expression is directly regulated by several Auxin Response Factors (ARFs; ARF5,7,8,19). Throughout RSL4 (and possibly RSL2), auxin activates the expression of two RBOHs (RBOHC,I) and four PERs (PER1,44,60,73) that together regulate ROS homeostasis in the apoplast (in combination with RBOHH). Based on Mangano et al. (2017) and the present work. B. High level of Pi in a low level environment of auxin would be sufficient to repress the RSL4/RSL2 transcriptional response. Pi repression may act at the level of depleting auxin levels in the atricoblast (1) or by repressing by unknown mechanism directly the expression of RSL4/RSL2 (2). C. High levels of Pi in the presence of high levels of auxin are able to activate the expression of RSL2 and control ROS-homeostasis derived from RBOHs and PERs activities. Solid lines indicate transcriptional activation or metabolite production. Reactive Oxygen Species (ROS) include hydroxyl radical ( $^{\bullet}\text{OH}$ ), superoxide ion ( $\text{O}_2^{\bullet-}$ ) and hydrogen peroxide ( $\text{H}_2\text{O}_2$ ).
